# Supplementary material
Source: PubMed Central journal article supplement (PMC6057156)
Supplement: NIHMS978537-supplement-Supplemental.pdf [file NIHMS978537-supplement-Supplemental.pdf]

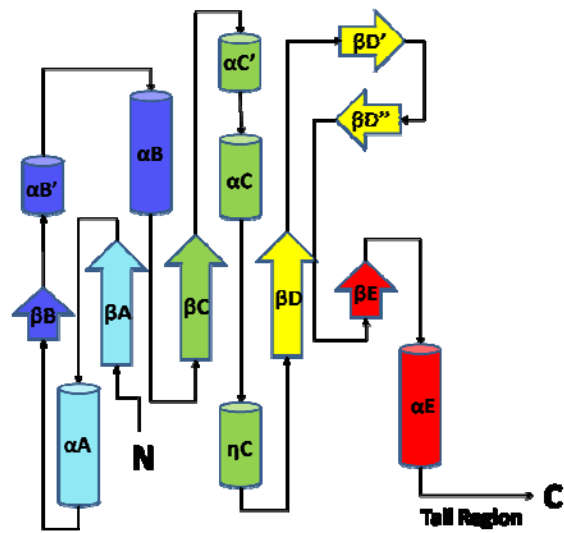

**Figure S1.** Topology diagram of the protein fold of BcSEFIR. The  $\alpha$ - and  $3_{10}$ -helices are represented by cylinders and  $\beta$ -strands are represented by arrows. Secondary structure elements are labeled.

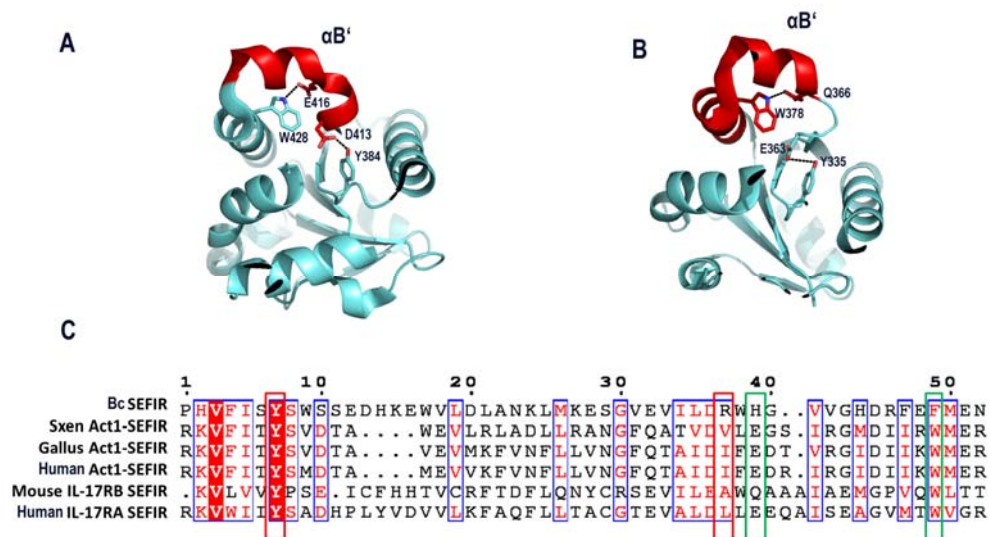

**Figure S2.** The helix  $\alpha B'$  in SEFIRs are hydrogen bond to helix  $\alpha B$ . IL-17RA-SEFIR helix  $\alpha B'$ , hydrophobic interactions and hydrogen bond are shown. (B) IL-17RB-SEFIR helix  $\alpha B'$ , hydrophobic interactions and hydrogen bond are shown. (C) Multiple sequence alignment of selected SEFIR domains, the conserved residues which formed hydrogen bond are shown.

SEFIR domain from *Bacillus cereus*, *Xenopus (Silurana) tropicalis*, *Gallus*, human Act1 and mouse IL-17RB-SEFIR, human IL-17RA-SEFIR are used in the alignment.

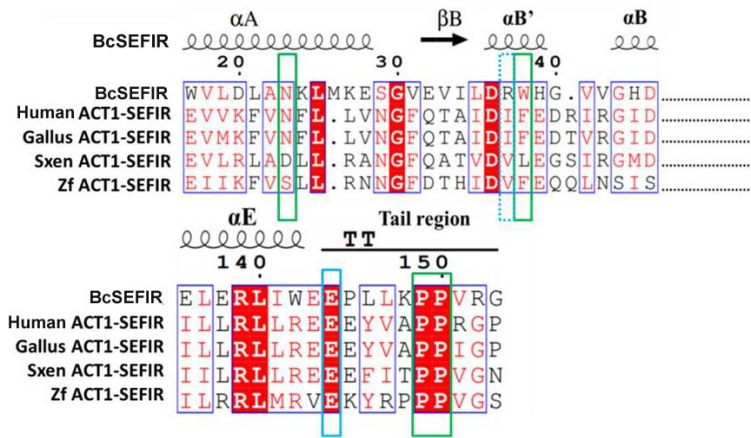

**Figure S3. Multiple sequence alignment of BcSEFIR and Act1-SEFIR in different species.** SEFIR domain from *Bacillus cereus*, Act1-SEFIR domain from human, *Gallus*, *Xenopus (Silurana) tropicalis* and Zebra fish are used in the alignment.

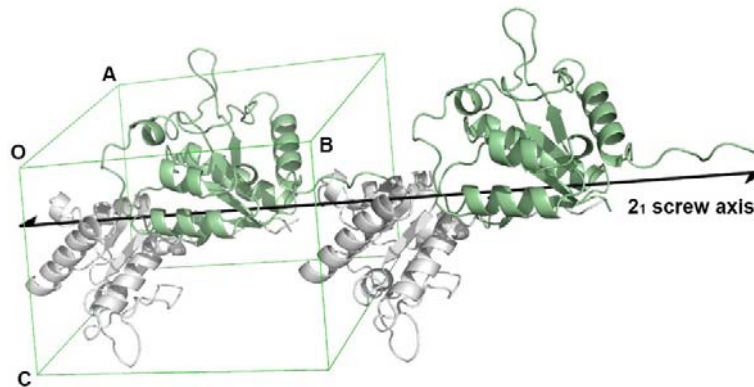

**Figure S4. Assembly of the BcSEFIR into higher order oligomers.** Via the asymmetric association between two adjacent BcSEFIR molecules, a fiber-like oligomeric structure with  $2_1$  screw axis is formed in the crystal, which could be a plausible model of SEFIR-mediated signaling.

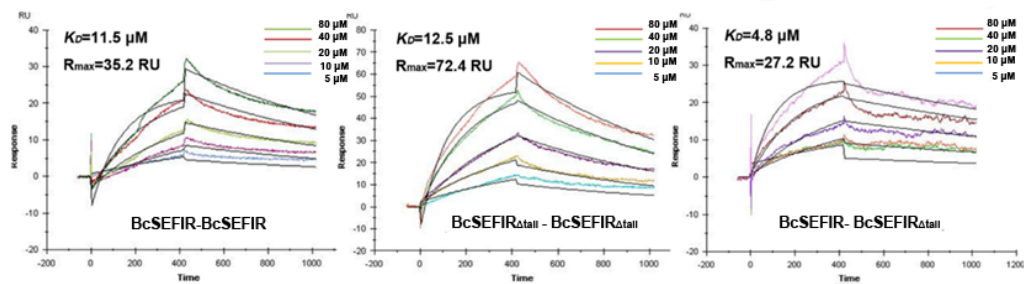

**Figure S5. SPR Binding assay of BcSEFIR.** Five different concentrations of ligand BcSEFIR were injected over the surface to which was immobilized with BcSEFIR proteins. The binding affinities between BcSEFIR-BcSEFIR, BcSEFIR $_{\Delta tail}$ -BcSEFIR $_{\Delta tail}$ , BcSEFIR-BcSEFIR $_{\Delta tail}$  were all assessed.

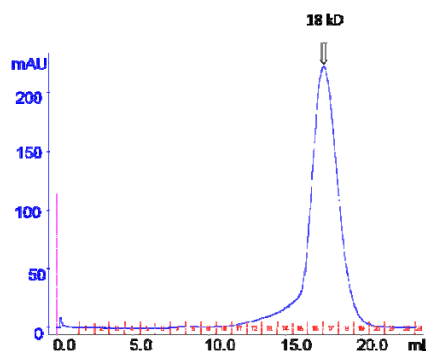

**Figure S6. Gel filtration chromatography profile of the recombinant BcSEFIR.** BcSEFIR was eluted as monomer in solution using size exclusion chromatography, arrow at the top indicate the eluted position of the molecular weight.

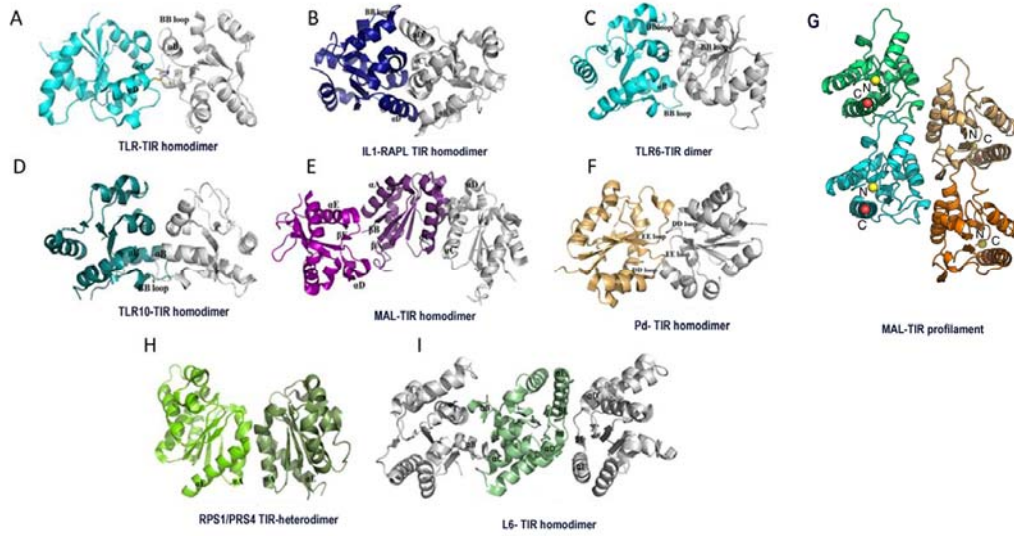

**Figure S7. Homodimerization of TIR domains in different species.** A number of homotypic TIR domain complexes have been proposed, but no common surface has been identified in mammalian TIR domains. A conserved symmetric TIR-TIR domain interface has been observed in the crystal structures of the bacterial TIR domains from PdTIR and TcpB, which share more than 60 % sequence identify. As to R protein RPS4, RRS1 and AtTIR in Arabidopsis, they all reveal a common TIR-TIR domain interface, while flax R-protein L6 revealed totally different interfaces.

**Table S1. Crystal lattice contacts identified by the PISA (Protein Interfaces, Surfaces, and Assemblies) server.**

| <b>BcSEFIR</b>                 | <b>Interface area</b> | <b>Number of hydrogen bond</b> | <b>Number of salt bridge</b> |
|--------------------------------|-----------------------|--------------------------------|------------------------------|
| asymmetric interface           | 662 Å <sup>2</sup>    | 5                              | 10                           |
| interface 1                    | 166 Å <sup>2</sup>    | 1                              | 0                            |
| interface 2                    | 146 Å <sup>2</sup>    | 5                              | 0                            |
| <hr/>                          |                       |                                |                              |
| <b>BcSEFIR<sub>Δtail</sub></b> | <b>Interface area</b> | <b>Number of hydrogen bond</b> | <b>Number of salt bridge</b> |
| symmetric interface            | 958 Å <sup>2</sup>    | 9                              | 5                            |
| interface 1                    | 512 Å <sup>2</sup>    | 3                              | 2                            |
| interface 2                    | 263 Å <sup>2</sup>    | 1                              | 2                            |
| interface 3                    | 227 Å <sup>2</sup>    | 1                              | 2                            |
| interface 4                    | 193.9 Å <sup>2</sup>  | 1                              | 0                            |
| Interface 5                    | 153 Å <sup>2</sup>    | 1                              | 3                            |
